# Supplementary material for: Effects of macrophage polarization on gold nanoparticle-assisted plasmonic photothermal therapy
Source: PubMed Central journal article supplement (PMC9037012; doi:10.1039/d1ra03671h), 2021-07-19
Supplement: RA-011-D1RA03671H-s001.pdf [file RA-011-D1RA03671H-s001.pdf]

**Electronic Supplementary Information**

**Effects of Macrophage Polarization on Gold Nanoparticle-Assisted  
Plasmonic Photothermal Therapy**

**Hala R. Ali,<sup>a\*</sup> Salah A. Selim<sup>b</sup> and Daniel Aili<sup>c\*</sup>**

<sup>a</sup>Department of Bacteriology and Immunology, Animal Health Research Institute (AHRI), Agriculture Research Center (ARC), Dokki-Giza, P.O. Box12618, Egypt.

<sup>b</sup>Department of Microbiology, Faculty of Veterinary Medicine, Cairo University, Giza, Cairo, Egypt.

<sup>c</sup>Laboratory of Molecular Materials, Division of Biophysics and Bioengineering, Department of Physics, Chemistry and Biology, Linköping University, SE-581 83 Linköping, Sweden.

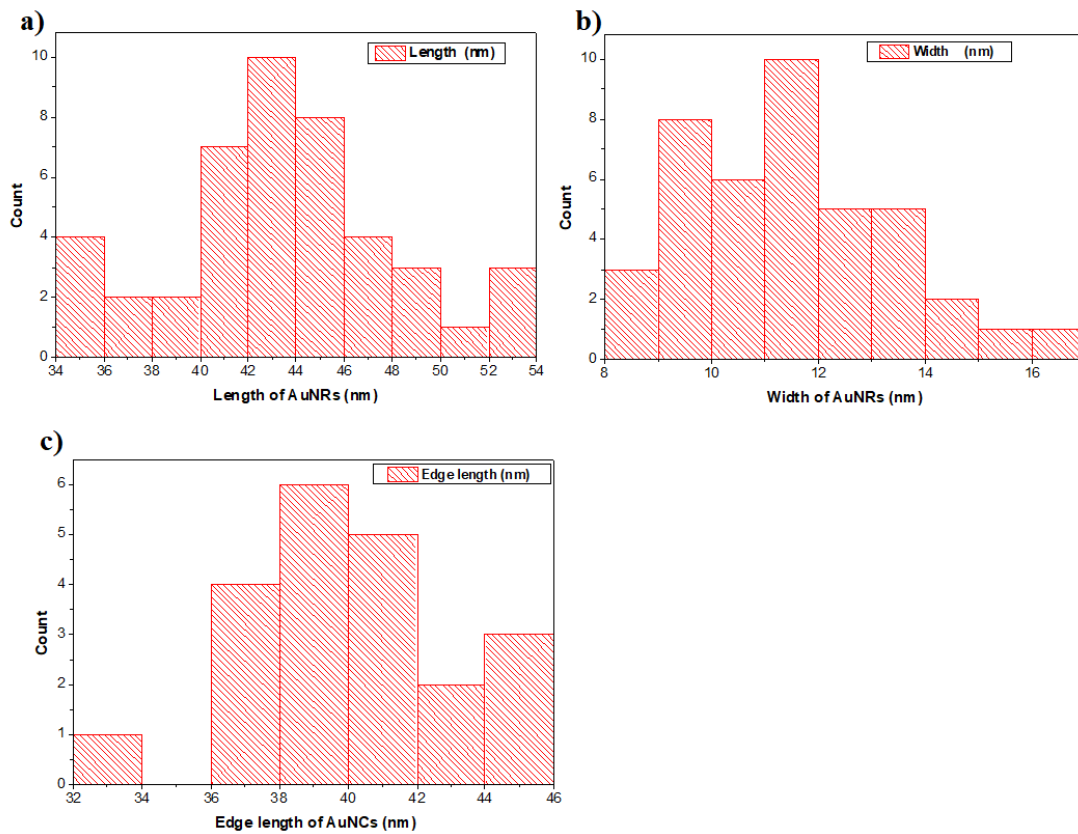

**Fig. S1.** Size distributions of the nanoparticles used. a) Length and b) width of the AuNRs, and c) edge length of AuNCs.

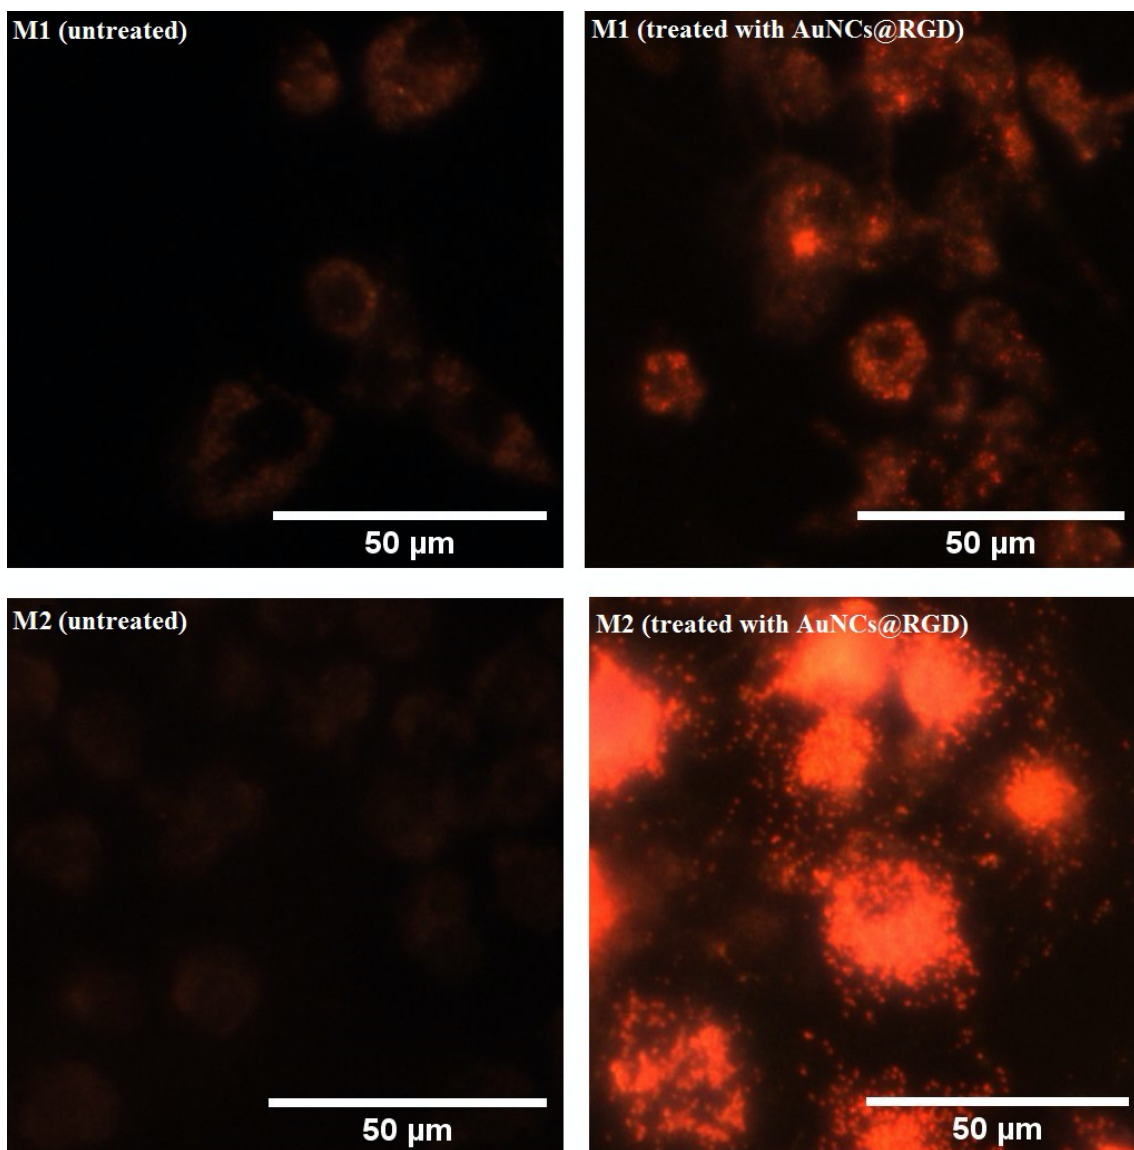

**Fig. S2.** Dark field images of M1 and M2 macrophages treated with 0.2 nM AuNCs@PEG/RGD.

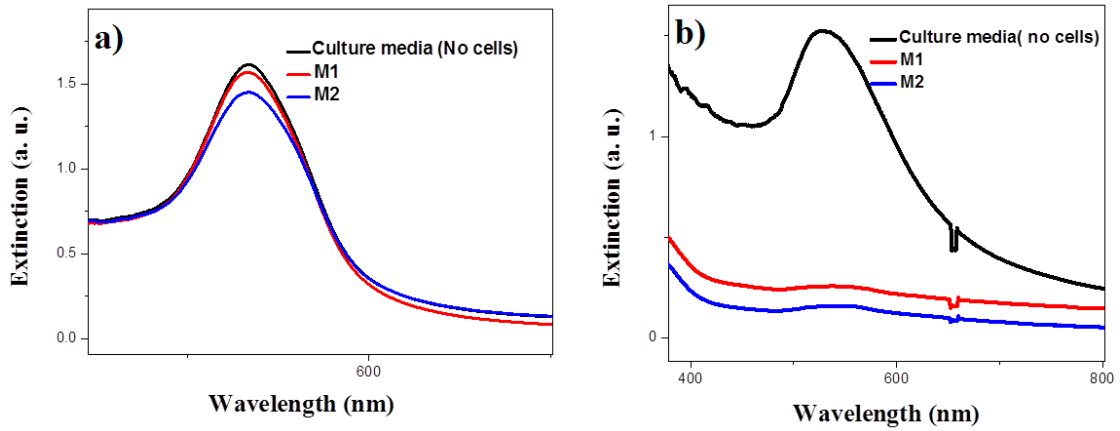

**Fig. S3.** UV-vis spectra of AuNCs@PEG/RGD/NLS in cell culture media before and after a) 8 hr and b) 20 hr incubation with M1 and M2 macrophages.

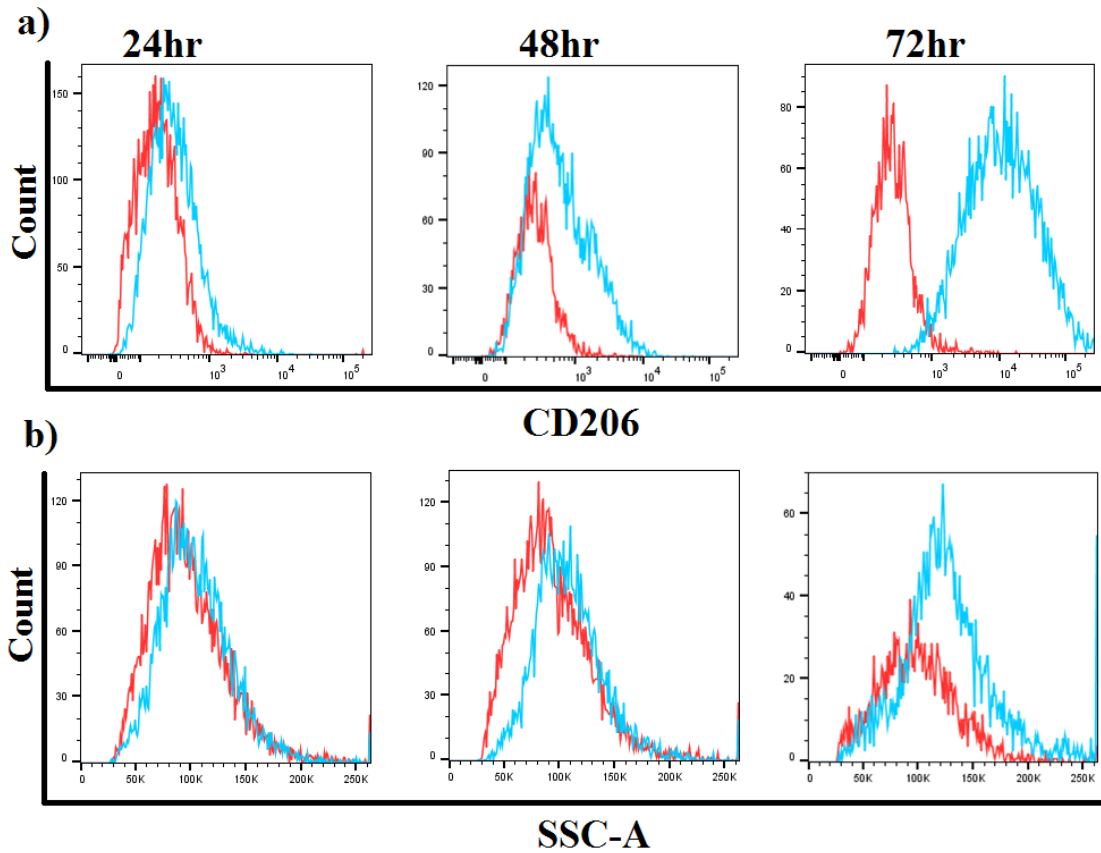

**Fig. S4.** Correlation between the CD-206 expression and cellular uptake of AuNCs@PEG/RGD/NLS. a) CD206 expression after stimulation of M0 with IL-4 / IL13 for 24, 48 and 72 hr. b) Histogram of THP-1 macrophages exposed to AuNCs after stimulation with IL-4 / IL13 for 24, 48 and 72 hr.

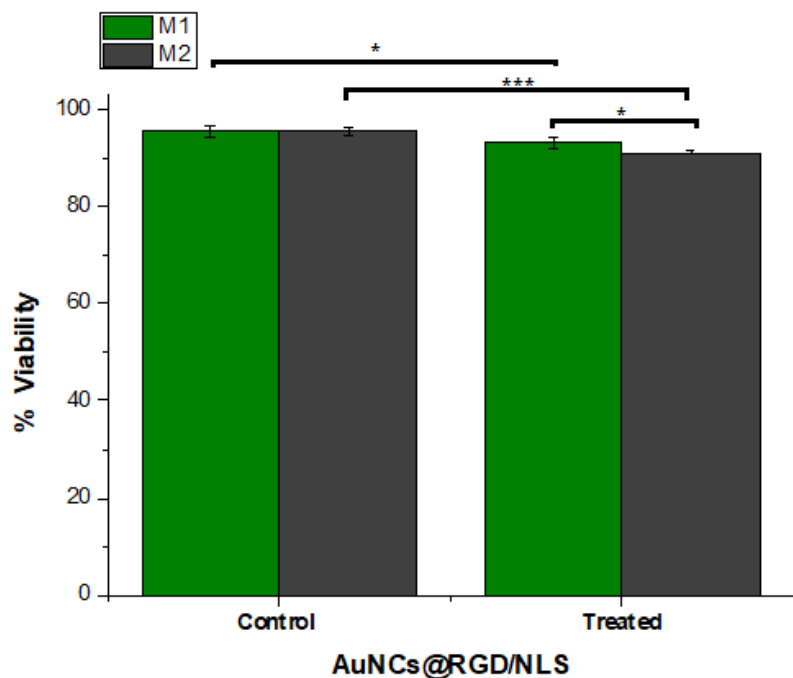

**Fig. S5.** Viability % of M1 and M2 macrophages upon treatment with AuNCs assisted plasmonic photothermal therapy. The percentage of viable cells is measured by apoptosis/ necrosis assay. Results are expressed as means  $\pm$  and P value  $< 0.05$  are considered significant. \*\*\*:  $P < 0.0001$  & \*:  $P < 0.05$ .

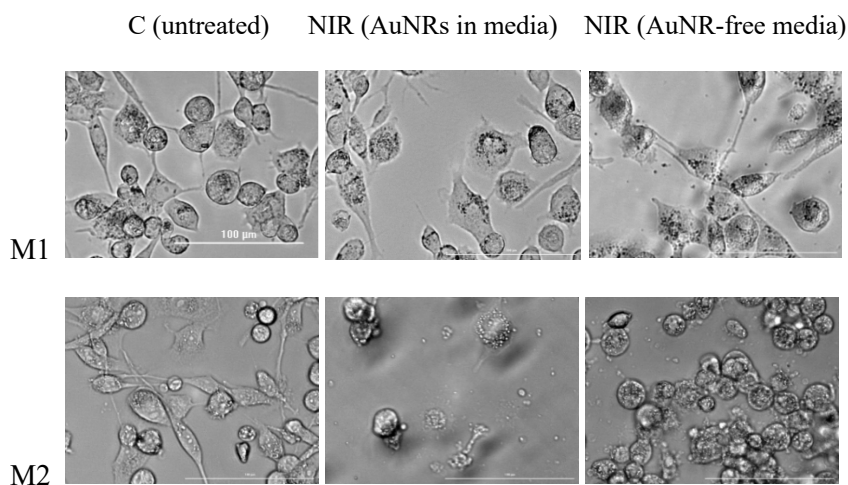

**Fig. S6.** Bright field images of M1 and M2 macrophages before and after AuNR-assisted plasmonic photothermal therapy in presence or absence of extracellular RGD and NLS functionalize PEGylated AuNRs. Scale bare is 100  $\mu\text{m}$ .
